# Supplementary material for: High internal phase emulsions stabilized solely by whey protein isolate-low methoxyl pectin complexes: effect of pH and polymer concentration
Source: Royal Society of Chemistry journal article supplement (doi:10.1039/c6fo01027j), 2016-09-26
Supplement: c6fo01027j1.pdf [file c6fo01027j1.pdf]

## Supplementary information

### Graphical abstract

*Emulsion fabrication and schematic of stabilization*

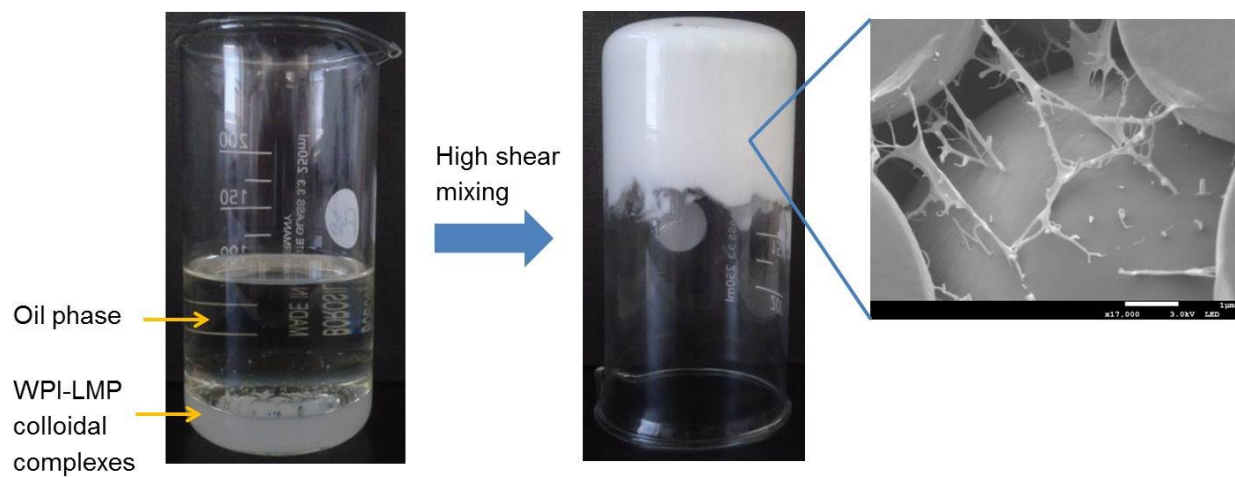

## Figures

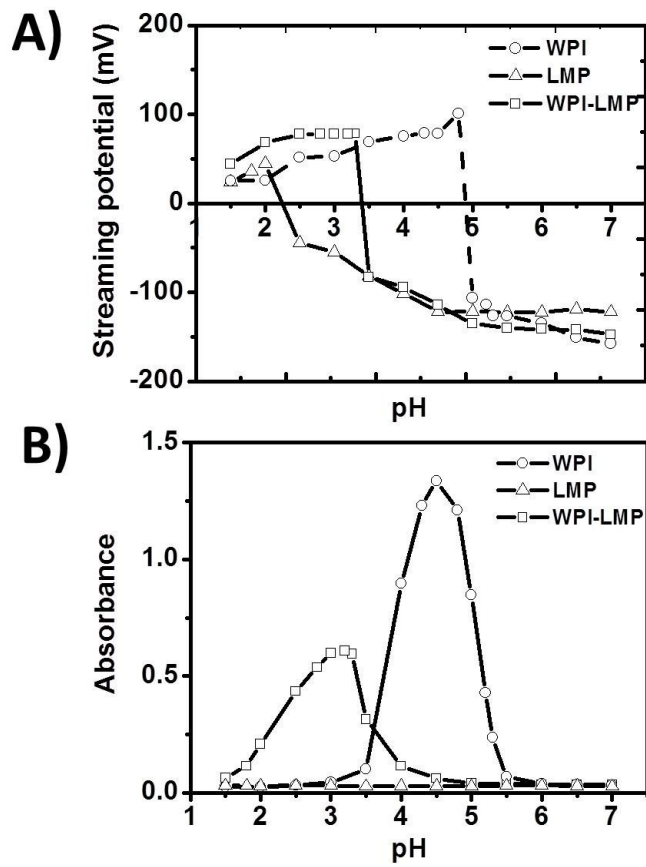

**Figure S1.** Streaming potential as a function of pH for WPI (1.0%), LMP (0.5%) and WPI-LMP (1:0.5%) (A). Absorbance against pH for WPI (1%), LMP (0.5%) and WPI-LMP (1:0.5%, with 10x dilution) (B).

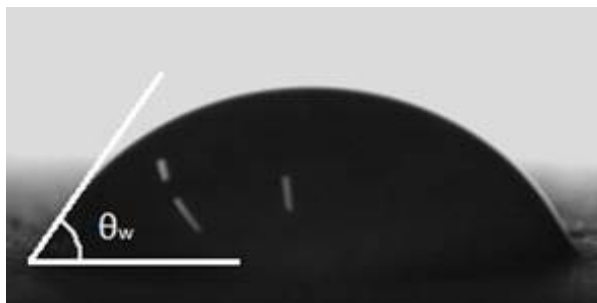

**Figure S2.** Contact angle ( $\theta_w$ ) of WPI-LMP complexes (2.5:1.25% w/w) formed at pH 4.5.

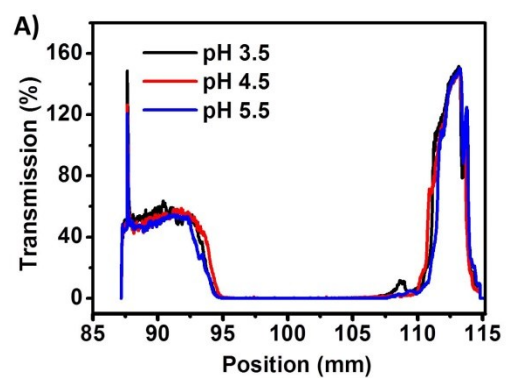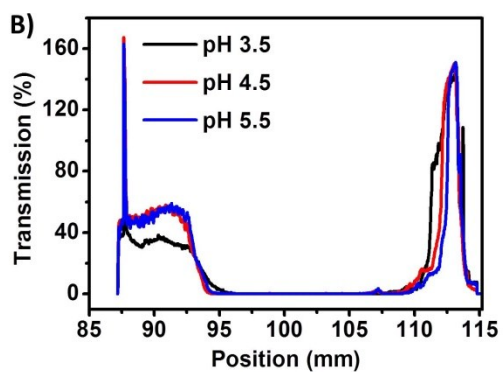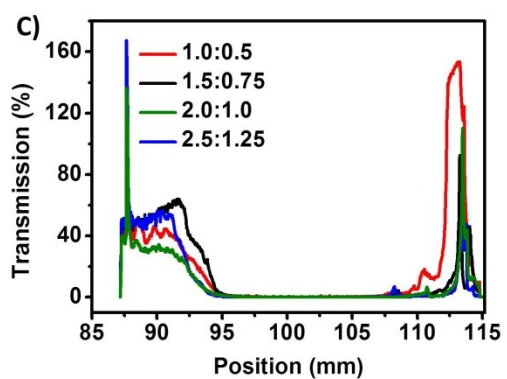

**Figure S3.** Phase separation profiles at the last measurement point (3600 s) of fresh HIPes stabilized by WPI (1.0%) (A) and complexes (1.0:0.5%) (B) as a function of pH and as a function of concentration (at pH 4.5) (C). The top and the bottom of the measurement region were located at a radial distance of approximately 95 mm and 115 mm from the rotation centre, respectively.

## Tables

**Table S1.** Specific surface area and Sauter mean diameter,  $D_{[3,2]}$ , as a function of biopolymer complex concentration

| Concentration (% w/w) | $D_{[3,2]}$ ( $\mu\text{m}$ ) | SSA ( $\text{m}^2/\text{kg}$ ) |
|-----------------------|-------------------------------|--------------------------------|
| 1.0:0.5               | $7.20 \pm 0.06$               | $906 \pm 8$                    |
| 1.5:0.75              | $6.32 \pm 0.08$               | $1033 \pm 12$                  |
| 2.0:1.0               | $5.93 \pm 0.03$               | $1102 \pm 3$                   |
| 2.5:1.25              | $5.35 \pm 0.10$               | $1238 \pm 9$                   |

**Table S2.** Elastic modulus within the LVR ( $G'_{\text{LVR}}$ ) and oscillatory yield stress of HIPEs as a function of pH

| pH  | $G'_{\text{LVR}}$ (Pa) |               | Osc. yield stress (Pa) |             |
|-----|------------------------|---------------|------------------------|-------------|
|     | WPI                    | Complexes     | WPI                    | Complexes   |
| 3.5 | $727 \pm 9$            | $1536 \pm 16$ | $100 \pm 0$            | $500 \pm 1$ |
| 4.5 | $228 \pm 11$           | $1135 \pm 8$  | $50 \pm 1$             | $251 \pm 1$ |
| 5.5 | $747 \pm 5$            | $1115 \pm 6$  | $126 \pm 0$            | $158 \pm 0$ |

**Table S3.** Elastic modulus within the LVR ( $G'_{\text{LVR}}$ ) and oscillatory yield stress of HIPEs as a function of biopolymer complex concentration (at pH 4.5)

| Concentration (% w/w) | $G'_{\text{LVR}}$ (Pa) | Osc. yield stress (Pa) |
|-----------------------|------------------------|------------------------|
| 1.0:0.5               | $1892 \pm 83$          | $316 \pm 1$            |
| 1.5:0.75              | $2789 \pm 39$          | $398 \pm 1$            |
| 2.0:1.0               | $3381 \pm 51$          | $631 \pm 0$            |
| 2.5:1.25              | $3835 \pm 64$          | $631 \pm 0$            |

**Table S4.** Creaming rate of HIPE samples stabilized by WPI and WPI-LMP complexes as a function of pH

| pH  | Creaming rate (%trans/1000s) |                      |
|-----|------------------------------|----------------------|
|     | WPI                          | Complexes            |
| 3.5 | $32.41 \pm 3.41^*$           | $23.66 \pm 1.52^*$   |
| 4.5 | $33.65 \pm 3.46^*$           | $5.43 \pm 0.72^{**}$ |
| 5.5 | $32.91 \pm 1.93^*$           | $2.39 \pm 0.10^{**}$ |

\*unstable emulsions, the slopes were determined by linear regression from the initial of steep rise of transmission before the plateau was reached, i.e. during the initial 1000 s measurement

\*\*stable emulsions, the slopes were determined by linear regression over the complete time interval of total integrated area of light transmission

**Table S5.** Creaming rate of HIPE samples stabilized by complexes (formed at pH 4.5) as a function of concentration

| Concentration (%) | Creaming rate (%trans/1000s) |
|-------------------|------------------------------|
| 1.0:0.5           | $5.76 \pm 0.11^{**}$         |
| 1.5:0.75          | $0.37 \pm 0.01^{**}$         |
| 2.0:1.0           | $0.16 \pm 0.00^{**}$         |
| 2.5:1.25          | $0.10 \pm 0.01^{**}$         |

\*\*stable emulsions, the slopes were determined by linear regression over the complete time interval of total integrated area of light transmission
